# Supplementary material
Source: HighWire-hosted journal article supplement (https://jnm.snmjournals.org/highwire/filestream/99039/field_highwire_adjunct_files/0/239277_Supplemental_Data.pdf)
Supplement: 239277_Supplemental_Data.pdf [file 239277_Supplemental_Data.pdf]

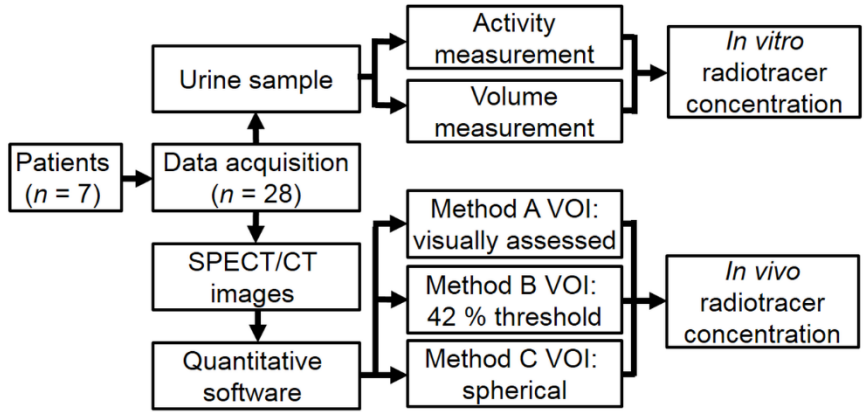

SUPPLEMENTAL FIGURE 1. Study design. Comparison of in vitro/in vivo radiotracer concentrations in  $^{177}\text{Lu}$ -PSMA treated patients.

**SUPPLEMENTAL TABLE 1**  
Patient Population Demographics

| <b>Patient</b>  | <b>Age (y)</b> | <b>Weight (kg)</b> | <b>Height (cm)</b> | <b>No. of cycles</b> | <b>No. of scans</b> |
|-----------------|----------------|--------------------|--------------------|----------------------|---------------------|
| <b>1</b>        | 71             | 70                 | 170                | 1                    | 1                   |
| <b>2</b>        | 88             | 60                 | 165                | 2                    | 5                   |
| <b>3</b>        | 70             | 73                 | 173                | 1                    | 3                   |
| <b>4</b>        | 81             | 103                | 172                | 3                    | 7                   |
| <b>5</b>        | 68             | 76                 | 172                | 2                    | 6                   |
| <b>6</b>        | 77             | 70                 | 173                | 2                    | 5                   |
| <b>7</b>        | 76             | 90                 | 171                | 1                    | 1                   |
| <b>Average:</b> | 76             | 77                 | 171                |                      |                     |
| <b>SD:*</b>     | 7              | 14                 | 3                  |                      |                     |
| <b>Total:</b>   |                |                    |                    | 12                   | 28                  |

\*SD: Standard deviation

**SUPPLEMENTAL TABLE 2**  
SPECT/CT Study Parameters

| <b>Study number</b> | <b>Patient number</b> | <b>Injected dose (GBq)</b> | <b>Uptake duration (h)</b> |
|---------------------|-----------------------|----------------------------|----------------------------|
| 1                   | 1                     | 6.29                       | 6.1                        |
| 2                   | 2                     | 6.22                       | 5.7                        |
| 3                   | 2                     | 6.21                       | 24.8                       |
| 4                   | 2                     | 6.18                       | 50.6                       |
| 5                   | 2                     | 3.93                       | 5.5                        |
| 6                   | 2                     | 3.91                       | 25.0                       |
| 7                   | 3                     | 6.07                       | 6.0                        |
| 8                   | 3                     | 6.06                       | 24.7                       |
| 9                   | 3                     | 6.02                       | 72.5                       |
| 10                  | 4                     | 5.84                       | 5.6                        |
| 11                  | 4                     | 5.81                       | 24.1                       |
| 12                  | 4                     | 5.72                       | 72.1                       |
| 13                  | 4                     | 6.11                       | 5.6                        |
| 14                  | 4                     | 6.09                       | 24.7                       |
| 15                  | 4                     | 6.04                       | 72.6                       |
| 16                  | 4                     | 5.55                       | 5.1                        |
| 17                  | 5                     | 6.01                       | 6.7                        |
| 18                  | 5                     | 5.98                       | 25.1                       |
| 19                  | 5                     | 5.90                       | 73.3                       |
| 20                  | 5                     | 5.51                       | 6.8                        |
| 21                  | 5                     | 5.47                       | 26.2                       |
| 22                  | 5                     | 5.39                       | 73.6                       |
| 23                  | 6                     | 5.74                       | 6.5                        |
| 24                  | 6                     | 5.72                       | 24.8                       |
| 25                  | 6                     | 5.70                       | 48.5                       |
| 26                  | 6                     | 4.75                       | 6.2                        |
| 27                  | 6                     | 4.73                       | 24.9                       |
| 28                  | 7                     | 6.70                       | 6.2                        |
| <b>Average:</b>     |                       | 5.70                       |                            |
| <b>SD:*</b>         |                       | 0.64                       |                            |

---

\*SD: Standard deviation
